# Supplementary material
Source: PubMed Central journal article supplement (PMC6823843)
Supplement: NIHMS1525903-supplement-Supplementary_Tables_1-2.pdf [file NIHMS1525903-supplement-Supplementary_Tables_1-2.pdf]

**Supplemental Table 1, Related to Figures 3 and 5: Table of the primers used in this study**

| ID            | Name                             | Organism | Sequence                   | Use                  | Assay |
|---------------|----------------------------------|----------|----------------------------|----------------------|-------|
| DC_h_45       | RPLP0 forward                    |          | CCTCACTGAGATCAGGGACATGTTGC | RNA expression       | qPCR  |
| DC_h_47       | RPLP0 reverse                    | human    | TGGTGCCCTGGAGATTTAGTGG     | RNA expression       | qPCR  |
| DC_h_362      | Pcdha4 as-lncRNA forward         | human    | TGGTAAAGAGCGACATCATGTG     | RNA expression       | qPCR  |
| DC_h_363      | Pcdha4 as-lncRNA reverse         | human    | ATGTGGACGTTGATCTCTCAGC     | RNA expression       | qPCR  |
| DC_h_19       | Pcdha4 s-cRNA forward            | human    | CAGAGAAGATCAGCTGCAGACA     | RNA expression       | qPCR  |
| dc_h_chip_6   | Pcdha4 s-cRNA reverse            | human    | CCCAGGGAAATTTGACTCTTAG     | RNA expression       | qPCR  |
| DC_h_19       | Pcdha4 spliced forward           | human    | CAGAGAAGATCAGCTGCAGACA     | RNA expression       | qPCR  |
| DC_h_24       | Pcdha4 spliced reverse           | human    | GCTCTCAGGGAGGCAGAGTAA      | RNA expression       | qPCR  |
| DC_h_551      | Pcdha12 as-lncRNA forward        | human    | ATTGGAATGTGGGTGCGGAGA      | RNA expression       | qPCR  |
| DC_h_552      | Pcdha12 as-lncRNA reverse        | human    | CCACCTAAGACGGACCTCATG      | RNA expression       | qPCR  |
| DC_h_21       | Pcdha12 s-cRNA forward           | human    | GCCCAAGCCTTCAGCTGTC        | RNA expression       | qPCR  |
| DC_h_chip_18  | Pcdha12 s-cRNA reverse           | human    | GAGAATGTAGTTATAACCTAAACGG  | RNA expression       | qPCR  |
| DC_h_21       | Pcdha12 spliced forward          | human    | GCCCAAGCCTTCAGCTGTC        | RNA expression       | qPCR  |
| DC_h_24       | Pcdha12 spliced reverse          | human    | GCTCTCAGGGAGGCAGAGTAA      | RNA expression       | qPCR  |
| DC_h_chip_24  | Pcdha4 pCBS forward              | human    | TACTTACGGTTTGGAGCCACAT     | ChIP and MEDIP       | qPCR  |
| DC_h_chip_39  | Pcdha4 pCBS reverse              | human    | GGAATTTCCCTTCTTCCTCTCT     | chromatin IP and DIP | qPCR  |
| DC_h_chip_105 | Pcdha4 pCBS/eCBS middle forward  | human    | GGCGTCTGCTGCTTACTTTC       | chromatin IP and DIP | qPCR  |
| DC_h_chip_106 | Pcdha4 pCBS/eCBS middle reverse  | human    | CGAGTAGTGGAGCTGACCGT       | chromatin IP and DIP | qPCR  |
| DC_h_chip_107 | Pcdha4 eCBS forward              | human    | GAACCTGTCCATCGCGGAATC      | chromatin IP and DIP | qPCR  |
| DC_h_chip_108 | Pcdha4 eCBS reverse              | human    | AAGTATTCATTTGGGCTCAGTCTG   | chromatin IP and DIP | qPCR  |
| DC_h_chip_26  | Pcdha6 pCBS forward              | human    | GATGTCGCTGTCTACCATGAAGT    | chromatin IP         | qPCR  |
| DC_h_chip_41  | Pcdha6 pCBS reverse              | human    | CAGTCAGGGAATGATGCAGTAA     | chromatin IP         | qPCR  |
| DC_h_chip_123 | Pcdha6 eCBS forward              | human    | CGCCCTTGTTCCCGGTAGAG       | chromatin IP         | qPCR  |
| DC_h_chip_124 | Pcdha6 eCBS reverse              | human    | CTAGCCCGAAGTATTCGCTAG      | chromatin IP         | qPCR  |
| DC_h_chip_29  | Pcdha9 pCBS forward              | human    | ACTTTGGGCCACGTGATGTC       | chromatin IP         | qPCR  |
| DC_h_chip_44  | Pcdha9 pCBS reverse              | human    | ATGGGAAAAGGGCTGTATTTGT     | chromatin IP         | qPCR  |
| DC_h_chip_125 | Pcdha9 eCBS forward              | human    | CATTAACGACAACCCCTCCAGTG    | chromatin IP         | qPCR  |
| DC_h_chip_126 | Pcdha9 eCBS reverse              | human    | CACGTCAGGAAGAAACTCA        | chromatin IP         | qPCR  |
| DC_h_chip_127 | Pcdha12 pCBS forward             | human    | GACCCAGGAAGTGGCTAAACC      | chromatin IP and DIP | qPCR  |
| DC_h_chip_130 | Pcdha12 pCBS forward             | human    | GTGAATGATTGGAATGTGGG       | chromatin IP and DIP | qPCR  |
| DC_h_chip_113 | Pcdha12 pCBS/eCBS middle forward | human    | CGTCTGCTGCTCTCGCTTC        | chromatin IP and DIP | qPCR  |
| DC_h_chip_114 | Pcdha12 pCBS/eCBS middle forward | human    | CGTGTTTGGCCTCCTCGTAG       | chromatin IP and DIP | qPCR  |
| DC_h_chip_115 | Pcdha12 eCBS forward             | human    | CGCCGGTGTTCAGAGAAAAGG      | chromatin IP and DIP | qPCR  |
| DC_h_chip_116 | Pcdha12 eCBS forward             | human    | GCATCAGAAGCGCCTCTAG        | chromatin IP and DIP | qPCR  |
| DC_h_chip_77  | HS5-1 L-CBS forward              | human    | GGGAGTGTCTGAGGGCTGAA       | chromatin IP         | qPCR  |
| DC_h_chip_78  | HS5-1 L-CBS reverse              | human    | TTCCGTACCATATGGATTGCTT     | chromatin IP         | qPCR  |
| DC_h_chip_79  | HS5-1 L-CBS/R-CBS middle forward | human    | CAAATGTAGTCCGTCCTCAGTG     | chromatin IP         | qPCR  |
| DC_h_chip_80  | HS5-1 L-CBS/R-CBS middle reverse | human    | GTACAAAAGTCAGTGTGCGTTATG   | chromatin IP         | qPCR  |
| DC_h_chip_119 | HS5-1 R-CBS forward              | human    | GGCCATTTCTTTGTGTGGTGA      | chromatin IP         | qPCR  |
| DC_h_chip_120 | HS5-1 R-CBS reverse              | human    | GCCCTACCGGAAGCTGTGTCAT     | chromatin IP         | qPCR  |

**Supplemental Table 2, Related to Figures 3, 4 and 5: Table of the guide RNAs (gRNAs) used in this study**

| ID         | Name                                        | Organism | Sequence            | Assay                |
|------------|---------------------------------------------|----------|---------------------|----------------------|
| a4_pCBS_1  | gRNA for a4 sense promoter                  | human    | AGTTTACAGTAGAGTGTG  | dCas9-VPR activation |
| a4_pCBS_2  | gRNA for a4 sense promoter                  | human    | AACCATATACACTCTT    | dCas9-VPR activation |
| a4_pCBS_3  | gRNA for a4 sense promoter                  | human    | CACAAAATACATGAGAGA  | dCas9-VPR activation |
| a4_pCBS_4  | gRNA for a4 sense promoter                  | human    | CCACACTCAATCAATCAG  | dCas9-VPR activation |
| a4_eCBS_1  | gRNA for a4 antisense promoter              | human    | CGGCCTGGATTCCGCGA   | dCas9-VPR activation |
| a4_eCBS_2  | gRNA for a4 antisense promoter              | human    | CAGAGAAAAGTATTCATT  | dCas9-VPR activation |
| a4_eCBS_3  | gRNA for a4 antisense promoter              | human    | AACGGTGCCAGTCAACT   | dCas9-VPR activation |
| a4_eCBS_4  | gRNA for a4 antisense promoter              | human    | ATCCGAGGCGCCCTCTAG  | dCas9-VPR activation |
| a6_pCBS_1  | gRNA for a6 sense promoter                  | human    | CGCCATCATTCAACAGTC  | dCas9-VPR activation |
| a6_pCBS_2  | gRNA for a6 sense promoter                  | human    | ACATCATGCGGCTCCAAA  | dCas9-VPR activation |
| a6_pCBS_3  | gRNA for a6 sense promoter                  | human    | GTGCAAATTACAAACGTG  | dCas9-VPR activation |
| a6_pCBS_4  | gRNA for a6 sense promoter                  | human    | TAACTATTCTACTCT     | dCas9-VPR activation |
| a6_eCBS_1  | gRNA for a6 antisense promoter              | human    | AGGAATAAGTTGTGTGC   | dCas9-VPR activation |
| a6_eCBS_2  | gRNA for a6 antisense promoter              | human    | GAGTTTATAGGTTAAGA   | dCas9-VPR activation |
| a6_eCBS_3  | gRNA for a6 antisense promoter              | human    | TGAGCCAACATCTGCAT   | dCas9-VPR activation |
| a6_eCBS_4  | gRNA for a6 antisense promoter              | human    | TCTACCGGGAACAAGGG   | dCas9-VPR activation |
| a9_pCBS_1  | gRNA for a9 sense promoter                  | human    | GTCATACAAAACCTTTAG  | dCas9-VPR activation |
| a9_pCBS_2  | gRNA for a9 sense promoter                  | human    | GCAGTCAGTCTGCTAAGA  | dCas9-VPR activation |
| a9_eCBS_1  | gRNA for a9 antisense promoter              | human    | GATTCTTTTGTGTCGCT   | dCas9-VPR activation |
| a9_eCBS_2  | gRNA for a9 antisense promoter              | human    | GAGCAATAAATGAAGCTC  | dCas9-VPR activation |
| a12_pCBS_1 | gRNA for a12 sense promoter                 | human    | ATGATAAAGTGTAGGTTT  | dCas9-VPR activation |
| a12_pCBS_2 | gRNA for a12 sense promoter                 | human    | AGAACCTACTTTTATCA   | dCas9-VPR activation |
| a12_pCBS_3 | gRNA for a12 sense promoter                 | human    | ACGATGGAGTGCTTGTGA  | dCas9-VPR activation |
| a12_pCBS_4 | gRNA for a12 sense promoter                 | human    | CGGATCATTTATAAATGC  | dCas9-VPR activation |
| a12_eCBS_1 | gRNA for a12 antisense promoter             | human    | CATTTAGACTTAACGCAT  | dCas9-VPR activation |
| a12_eCBS_2 | gRNA for a12 antisense promoter             | human    | AGGCGCAGATTTCAGAAAC | dCas9-VPR activation |
| a12_eCBS_3 | gRNA for a12 antisense promoter             | human    | ATCAGAAGCGCCCTCTAG  | dCas9-VPR activation |
| a12_eCBS_4 | gRNA for a12 antisense promoter             | human    | CAGCAATAAATTGAGTTT  | dCas9-VPR activation |
| adel_1     | gRNA used to generate SK-N-SH- $\alpha$ het | human    | CTCGGATCTAGAGGATAG  | Genome editing       |
| adel_2     | gRNA used to generate SK-N-SH- $\alpha$ het | human    | GTGGTAAGATTGTTTGTCT | Genome editing       |
